# Supplementary material
Source: PubMed Central journal article supplement (PMC5228619)

Cell Chemical Biology, Volume 23

## Supplemental Information

### **MRSA Isolates from United States Hospitals**

### **Carry *dfrG* and *dfrK* Resistance Genes and Succumb to Propargyl-Linked Antifolates**

**Stephanie M. Reeve, Eric W. Scocchera, Narendran G-Dayanadan, Santosh Keshipeddy, Jolanta Krucinska, Behnoush Hajian, Jacob Ferreira, Michael Nailor, Jeffrey Aeschlimann, Dennis L. Wright, and Amy C. Anderson**

**Table S1.** Related to Table 1. Antibiotic Susceptibility Profiles of Clinical MRSA Isolates ( $\mu\text{g/mL}$ )

| Strain       | Erythromycin | Clindamycin     | Tetracycline | Gentamicin   | Levofloxacin | Ciprofloxacin | Gatifloxacin |
|--------------|--------------|-----------------|--------------|--------------|--------------|---------------|--------------|
| UCH MRSA 1   | >4 (R)       | $\leq 0.12$ (S) | $\leq 2$ (S) | $\leq 2$ (S) | 64 (R)       | >64 (R)       | >8(R)        |
| UCH MRSA 115 | <0.25 (S)    | $\leq 0.12$ (S) | >16 (R)      | >16 (R)      | >64 (R)      | >64 (R)       | >8(R)        |
| UCH MRSA 121 | >4 (R)       | 0.25 (S)        | $\leq 2$ (S) | $\leq 2$ (S) | >64 (R)      | 64 (R)        | >8(R)        |
| UCH MRSA 127 | >4 (R)       | $\leq 0.12$ (S) | $\leq 2$ (S) | $\leq 2$ (S) | 8 (R)        | 32 (R)        | 4(R)         |
| HH MRSA 714  | 2 (R)        | $\leq 0.12$ (S) | $\leq 2$ (S) | $\leq 2$ (S) | >64 (R)      | 64 (R)        | >8(R)        |
| HH MRSA 1144 | >4 (R)       | >2 (R)          | >16 (R)      | >16 (R)      | 8 (R)        | 64 (R)        | 4 (R)        |
| HH MRSA 1184 | >4 (R)       | 0.25 (S)        | $\leq 2$ (S) | $\leq 2$ (S) | 0.25 (S)     | 1 (S)         | <1 (S)       |
| UCH MSSA 1   | >4 (R)       | >2 (R)          | $\leq 2$ (S) | $\leq 2$ (S) | 8 (R)        | 64 (R)        | 2 (S)        |

All strains are sensitive to synercid ( $\text{MIC} \leq 0.5 \mu\text{g/mL}$ ), daptomycin ( $\text{MIC} \leq 0.5 \mu\text{g/mL}$ ), rifampin ( $\text{MIC} \leq 0.5 \mu\text{g/mL}$ ), vancomycin ( $\text{MIC} \leq 2 \mu\text{g/mL}$ ), streptomycin ( $\text{MIC} \leq 1000 \mu\text{g/mL}$ ), and linezolid ( $\text{MIC} \leq 1 \mu\text{g/mL}$ ). All strains are resistant to ampicillin ( $\text{MIC} \geq 16 \mu\text{g/mL}$ ), penicillin ( $\text{MIC} > 8 \mu\text{g/mL}$ ). UCH MSSA-1 is sensitive to oxacillin.

**Table S2.** Related to Table 1 and Table S1. Molecular Mechanisms of Antibiotic Resistance for Clinical Isolates

|                                                 | Resistance Mechanism                                                                            | MIC Range ( $\mu\text{g/mL}$ ) | Strains                                           |
|-------------------------------------------------|-------------------------------------------------------------------------------------------------|--------------------------------|---------------------------------------------------|
| Trimethoprim                                    | <i>dfrA</i>                                                                                     | 250                            | UCH115, HH1144                                    |
|                                                 | <i>dfrG</i>                                                                                     | >1000                          | UCH MRSA1, UCH121, UCH127, HH714, UCH MSSA1       |
|                                                 | <i>dfrK</i>                                                                                     | >1000                          | HH1184                                            |
| Sulfamethoxazole                                | <i>folB</i> (F17L, V30I, T31N, M37I, I58V, T59S, V60L, L64M, I110M, V117I, V126I, E208K, F226L) | >500                           | UCH MRSA1                                         |
|                                                 | <i>folB</i> (F17L, T28S, T59S, L64M, E205K)                                                     | $\geq 500$                     | UCH115, UCH 121, UCH127, HH714, HH1144, UCH MSSA1 |
|                                                 | <i>folB</i> (V30I, I58V, T59S, V60L, L64M, I110M, V117I, V126I, F226L)                          | 32                             | HH1184                                            |
| Tetracycline                                    | <i>TetM</i>                                                                                     | >16                            | UCH115, HH1144                                    |
| Gentamicin                                      | <i>aac(2' )-apc(6'')</i>                                                                        | >16                            | UCH115, HH1144                                    |
| Erythromycin                                    | <i>mphC</i>                                                                                     | 8-32                           | UCH121, UCH127, HH1184                            |
|                                                 | <i>ermC</i>                                                                                     | >64                            | UCH MRSA1, HH1144, UCH MSSA 1                     |
| Clindamycin                                     | <i>ermC</i>                                                                                     | >64                            | UCH MRSA1, HH1144, UCH MSSA 1                     |
| Levofloxacin/<br>Ciprofloxacin/<br>Gatifloxacin | <i>gyrA</i> (S84R ,S85P), <i>grlA</i> (S80F), <i>grlB</i> (E471K)                               | 64/ >64/>8                     | UCH MRSA1                                         |
|                                                 | <i>gyrA</i> (S84L, S85P), <i>gyrA</i> (S90K, E84K)                                              | >64/>64/ >8                    | UCH115                                            |
|                                                 | <i>gyrA</i> (S84R ,S85P), <i>grlA</i> (S80F), <i>grlB</i> (D432V)                               | >64/64/>8                      | UCH121, HH714                                     |
|                                                 | <i>gyrA</i> (S84L) and <i>grlA</i> (S80F), <i>grlB</i> (D432V, E596D*)                          | 8/32/4                         | UCH127                                            |
|                                                 | <i>gyrA</i> (S84L) and <i>grlA</i> (S80F)                                                       | 8/64/4                         | HH1144                                            |
| Levofloxacin/<br>Ciprofloxacin                  | <i>gyrA</i> (S84L)                                                                              | 8/64                           | UCH MSSA1                                         |

**Table S3.** Related to Table 2. Fluoroquinolone Minimum Inhibitory Concentrations Supplemented with Reserpine (µg/mL)

| Strain       | Minimum Inhibitory Concentration |               | Minimum Inhibitory Concentration with 20 µg/mL Reserpine |               |
|--------------|----------------------------------|---------------|----------------------------------------------------------|---------------|
|              | Levofloxacin                     | Ciprofloxacin | Levofloxacin                                             | Ciprofloxacin |
| UCH MRSA 1   | 64                               | >64           | 64 (1)                                                   | 32 (≥2)       |
| UCH MRSA 115 | >64                              | >64           | >64 (≥1)                                                 | 32 (≥2)       |
| UCH MRSA 121 | >64                              | 64            | >64 (≥1)                                                 | 32 (2)        |
| UCH MRSA 127 | 8                                | 32            | 4 (2)                                                    | 8 (4)         |
| HH MRSA 714  | >64                              | 64            | >64 (≥1)                                                 | 32 (2)        |
| HH MRSA 1144 | 8                                | 64            | 8 (1)                                                    | 16 (4)        |
| HH MRSA 1184 | 0.25                             | 1             | <0.125 (≥2)                                              | <0.125 (>4)   |
| UCH MSSA 1   | 8                                | 64            | 8 (1)                                                    | 32 (2)        |

Fold increases in MIC noted in parentheses

**Table S4.** Related to Table 2. Synergy Minimum Inhibitory Concentrations Supplemented with Sulfamethoxazole (µg/mL)

| Strain        |             | UCP1039 | UCP1164 | UCP1172 | UCP1173 | UCP1191 | UCP1205 | UCP1206 |
|---------------|-------------|---------|---------|---------|---------|---------|---------|---------|
| UCHC MRSA 115 | <i>dfrA</i> | 1.25    | 0.3125  | 1.25    | 0.1563  | 0.625   | 2.5     | 0.625   |
| HH MRSA 714   | <i>dfrG</i> | 0.0391  | 0.3125  | 0.3125  | 0.3125  | 0.0391  | 0.0391  | 0.1563  |
| HH MRSA 1184  | <i>dfrK</i> | ≤0.0098 | ≤0.0098 | ≤0.0098 | ≤0.0098 | ≤0.0098 | ≤0.0098 | ≤0.0098 |

\*UCH MRSA115 and HH MRSA115 contained 100 µg/mL SMX and HH MRSA1184 contains 10 µg/mL

**Table S5.** Related to Figure 2. Crystallography Data Collection and Structure Refinement Statistics

|                                                          | <b>DfrB :NADPH:UCP1191</b>                |
|----------------------------------------------------------|-------------------------------------------|
| PDB ID                                                   | 5JG0                                      |
| Space group                                              | <i>P6<sub>1</sub>22</i>                   |
| No. monomers in asymmetric unit                          | 1                                         |
| Unit cell ( <i>a, b, c</i> in Å)                         | 78.86, 78.86, 106.43<br>90.0, 90.0, 120.0 |
| Resolution (Å)                                           | 39.44-1.88 (1.91-1.88)                    |
| Completeness % (last shell, %)                           | 99.75 (97.0)                              |
| Unique reflections                                       | 16, 498                                   |
| Redundancy (last shell)                                  | 16.7 (17.4)                               |
| Rsym, (last shell)                                       | 0.107 (0.483)                             |
| $\langle I/\sigma \rangle$ (last shell)                  | 41.2 (5.52)                               |
| R-factor/Rfree                                           | 0.1765/ 0.2172                            |
| No. of atoms (protein, ligands, solvent)                 | 1,458                                     |
| Rms deviation bond lengths (Å), angles (deg)             | 0.007, 1.238                              |
| Average B factor for protein (Å <sup>2</sup> )           | 29.54                                     |
| Average B factor for ligand (Å <sup>2</sup> )            | 25.34 β-NADPH<br>34.66 Inhibitor          |
| Average B factor for solvent molecules (Å <sup>2</sup> ) | 35.74                                     |
| Residues in most favored regions (%) <sup>a</sup>        | 98.12                                     |
| Residues in additional allowed regions (%) <sup>a</sup>  | 1.88                                      |
| Residues in disallowed regions (%) <sup>a</sup>          | 0                                         |
| Collection Location                                      | SSRL Beamline 7-1                         |

<sup>a</sup> According to an analysis of the Ramachandran plot

**Table S6.** Related to Figure 3. Structural analysis of residues involved in binding PLAs and NADPH

| <b>DfrB:PLA Interactions</b>   |                                                                              |                           |                                                                                   |
|--------------------------------|------------------------------------------------------------------------------|---------------------------|-----------------------------------------------------------------------------------|
| <b>Residue</b>                 | <b>Binding Partner</b>                                                       | <b>Bond Distance (Å)</b>  | <b>Comments</b>                                                                   |
| Leu5                           | Backbone to C <sub>2</sub> -NH <sub>3</sub>                                  | 2.9                       | Leu5Ile Mutation in all TMP <sup>R</sup> enzymes                                  |
| Asp27                          | Side chain to C <sub>4</sub> -NH <sub>3</sub>                                | 3.2                       | Conserved in all <i>dfr</i> enzymes                                               |
|                                | Side chain to N <sub>5</sub>                                                 | 2.6                       |                                                                                   |
| Leu28                          | Hydrophobic interactions with B-C ring system and C <sub>6</sub> ethyl       |                           | Leu28Tyr mutation in <i>dfrG/K</i> no mutation in <i>dfrA</i>                     |
| His30                          | Coordinates H <sub>2</sub> O with pyrimidine C <sub>4</sub> -NH <sub>3</sub> | 3.1, 3.2                  | His30Tyr mutations in <i>dfrK/G</i> , mutations known to be relevant <sup>1</sup> |
| Val31                          | Hydrophobic interaction with pyrimidine C <sub>6</sub> -ethyl                |                           | Val31Ile in <i>dfrA</i> , mutations known to be relevant <sup>2</sup>             |
| Ile50                          | Side chains make hydrophobic interactions with B-C ring system               |                           | Conserved in all <i>dfr</i> enzymes                                               |
| Leu54                          |                                                                              |                           | Conserved in all <i>dfr</i> enzymes                                               |
| Arg57                          | Side chain to C-ring COOH                                                    | 2.8                       | Conserved in all <i>dfr</i> enzymes                                               |
| Phe92                          | Backbone to pyrimidine C <sub>2</sub> -NH <sub>3</sub>                       | 3.1                       | Conserved in all <i>dfr</i> enzymes                                               |
| Phe98                          | Mutations known to be relevant <sup>3</sup>                                  |                           | Phe98Tyr mutation in all <i>dfr</i> enzymes.                                      |
| <b>DfrB:NADPH Interactions</b> |                                                                              |                           |                                                                                   |
| <b>Residue</b>                 | <b>Binding Partners</b>                                                      | <b>Bond Distances (Å)</b> | <b>Comments</b>                                                                   |
| Ala7                           | BB Carbonyl to Nicotinamide amide (NH <sub>2</sub> )                         | 2.8                       | Conserved in all <i>dfr</i> enzymes                                               |
|                                | BB amine to Nicotinamide amide (OH)                                          | 2.7                       |                                                                                   |
| Gln19                          | Nicotinamide ribose                                                          | 3.3                       | Gln19Asp in <i>dfrG/K</i>                                                         |
| Arg44                          | Guanidine to ribose phosphate                                                | 3.2                       | Conserved in all <i>dfr</i> enzymes                                               |
|                                | γ -NH to ribose phosphate                                                    | 2.9                       |                                                                                   |
| Thr46                          | Side chain to phosphate                                                      | 2.5                       | Thr46His in <i>dfrG/K</i>                                                         |
| Thr63                          | Side chain to ribose phosphate                                               | 2.8                       | Conserved in all <i>dfr</i> enzymes                                               |
| Glu100                         | Side chain to adenine                                                        | 2.9/2.7                   | Glu100Leu in <i>dfrG/K</i> Glu100Ala in <i>dfrA</i>                               |

(BB) Backbone (SC) side chain

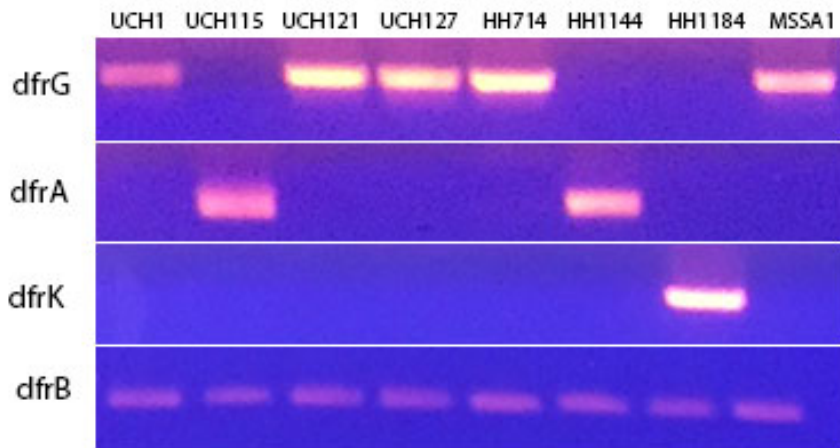

**Figure S1.** Related to Table 1. Composite PCR Gel for Gene Identification

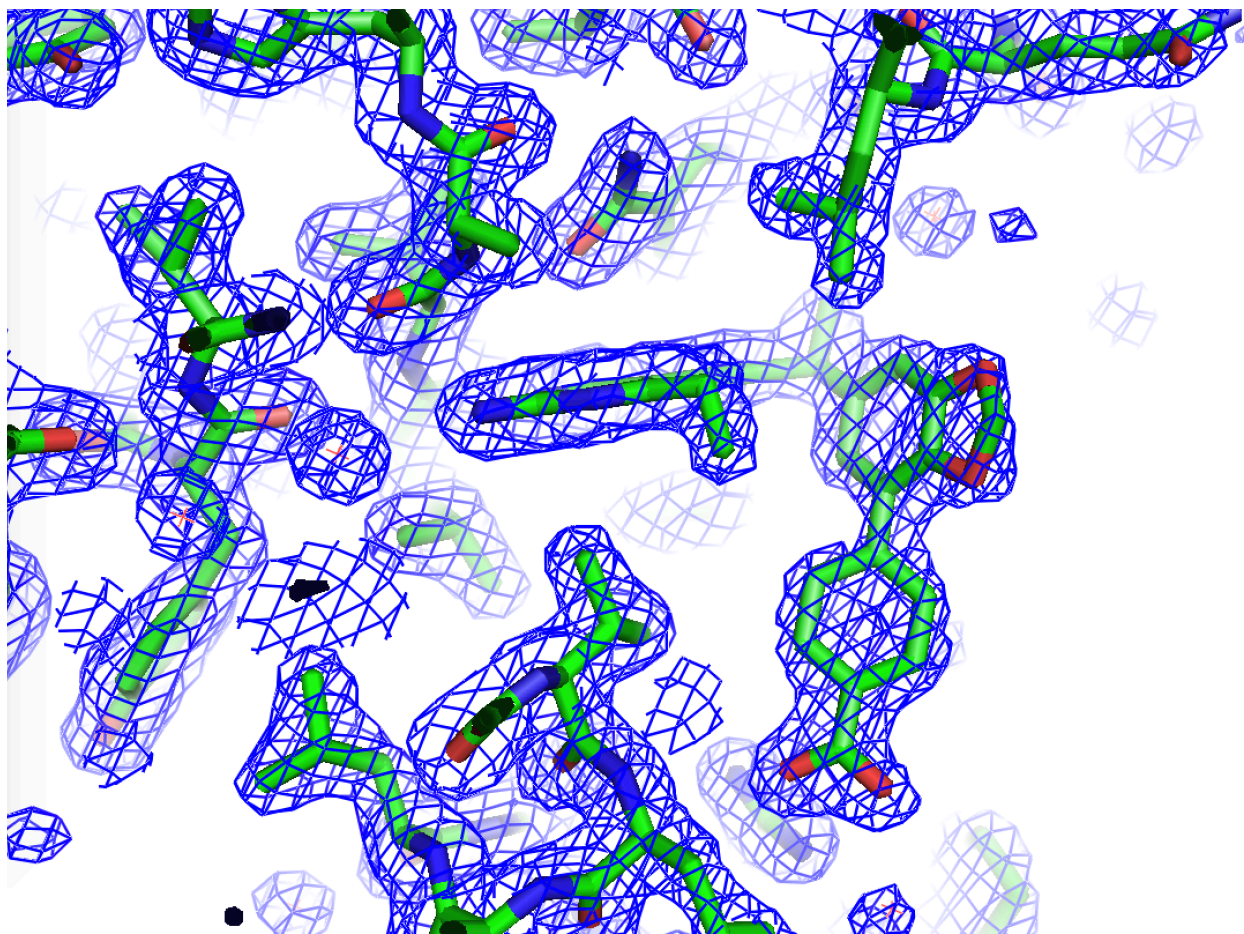

**Figure S2.** Related to Figure 2. OMIT Map from crystal structure of SaDHFR bound to NADPH and UCP1191.

Electron density ( $2F_o - F_c$ ) of the active site residues for the Sa(WT)DHFR:NADPH:UCP1191, shown at  $1.0\sigma$

Fig. S3. Related to Experimentnal.  $^1\text{H}$  and  $^{13}\text{C}$  NMR of UCP1205

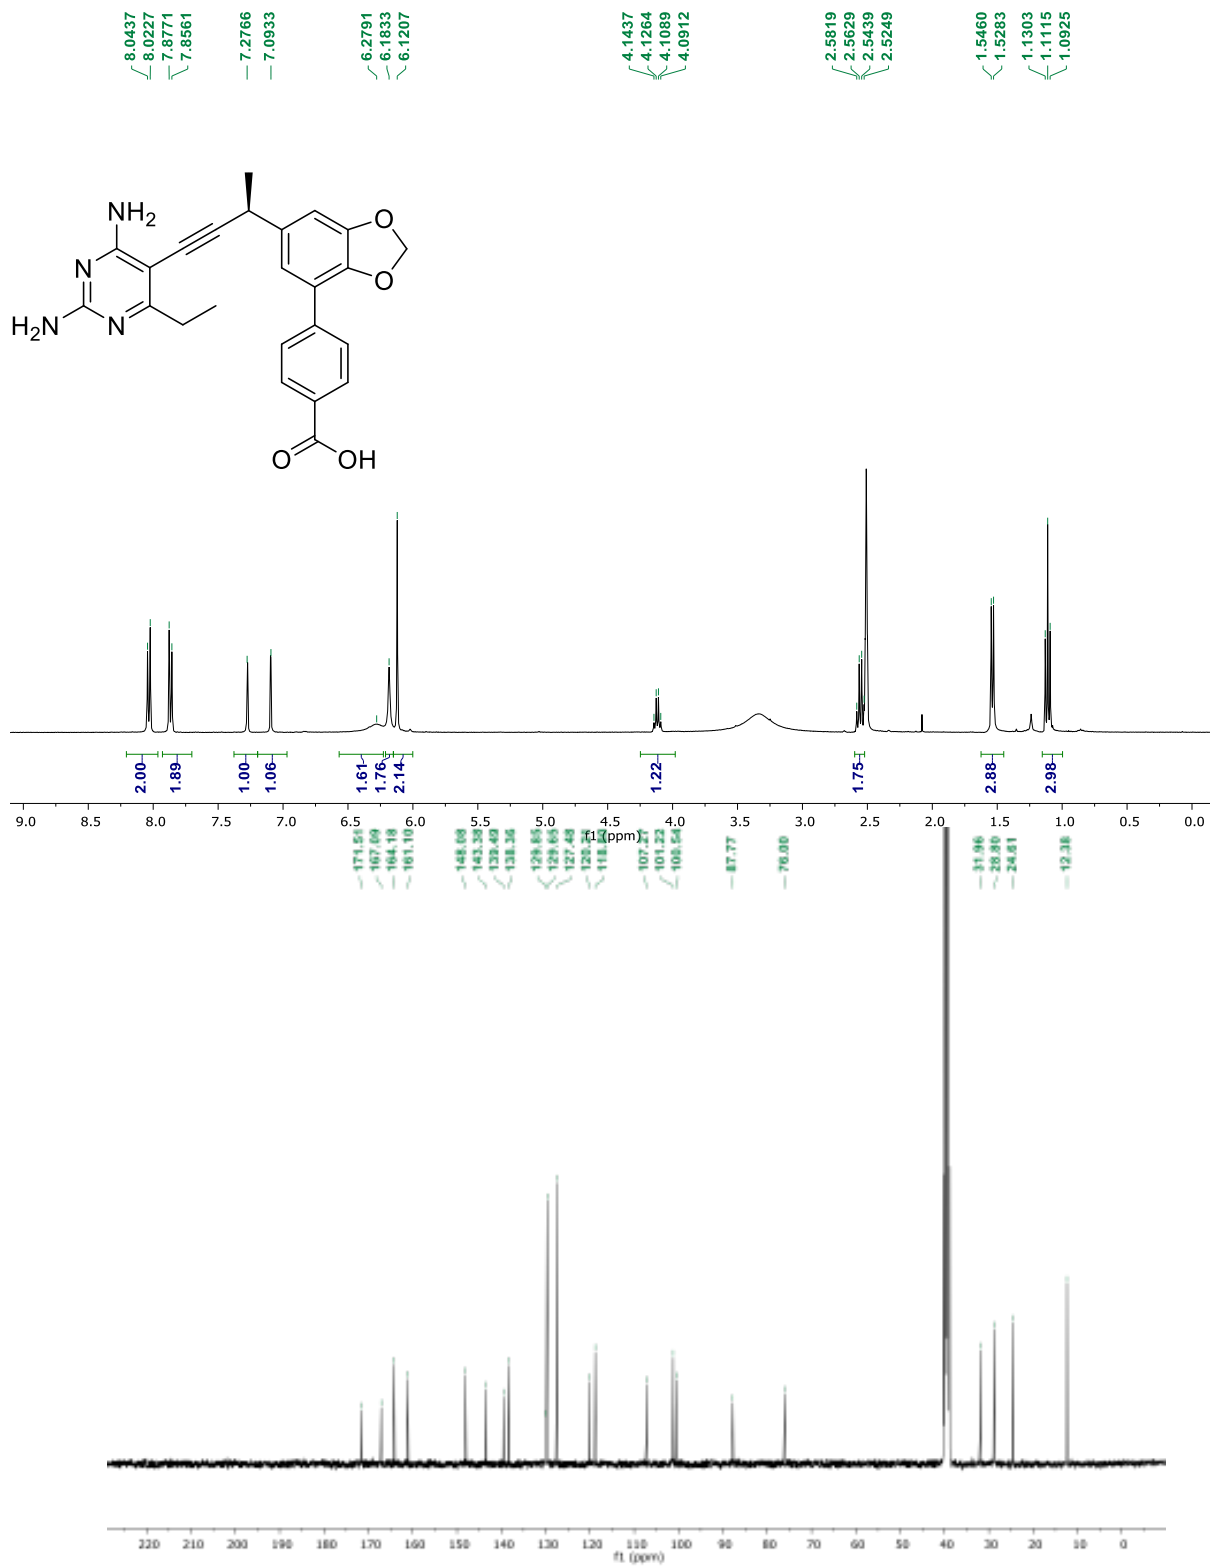



Fig. S4. Related to Experimental.  $^1\text{H}$  and  $^{13}\text{C}$ NMR of UCP1206

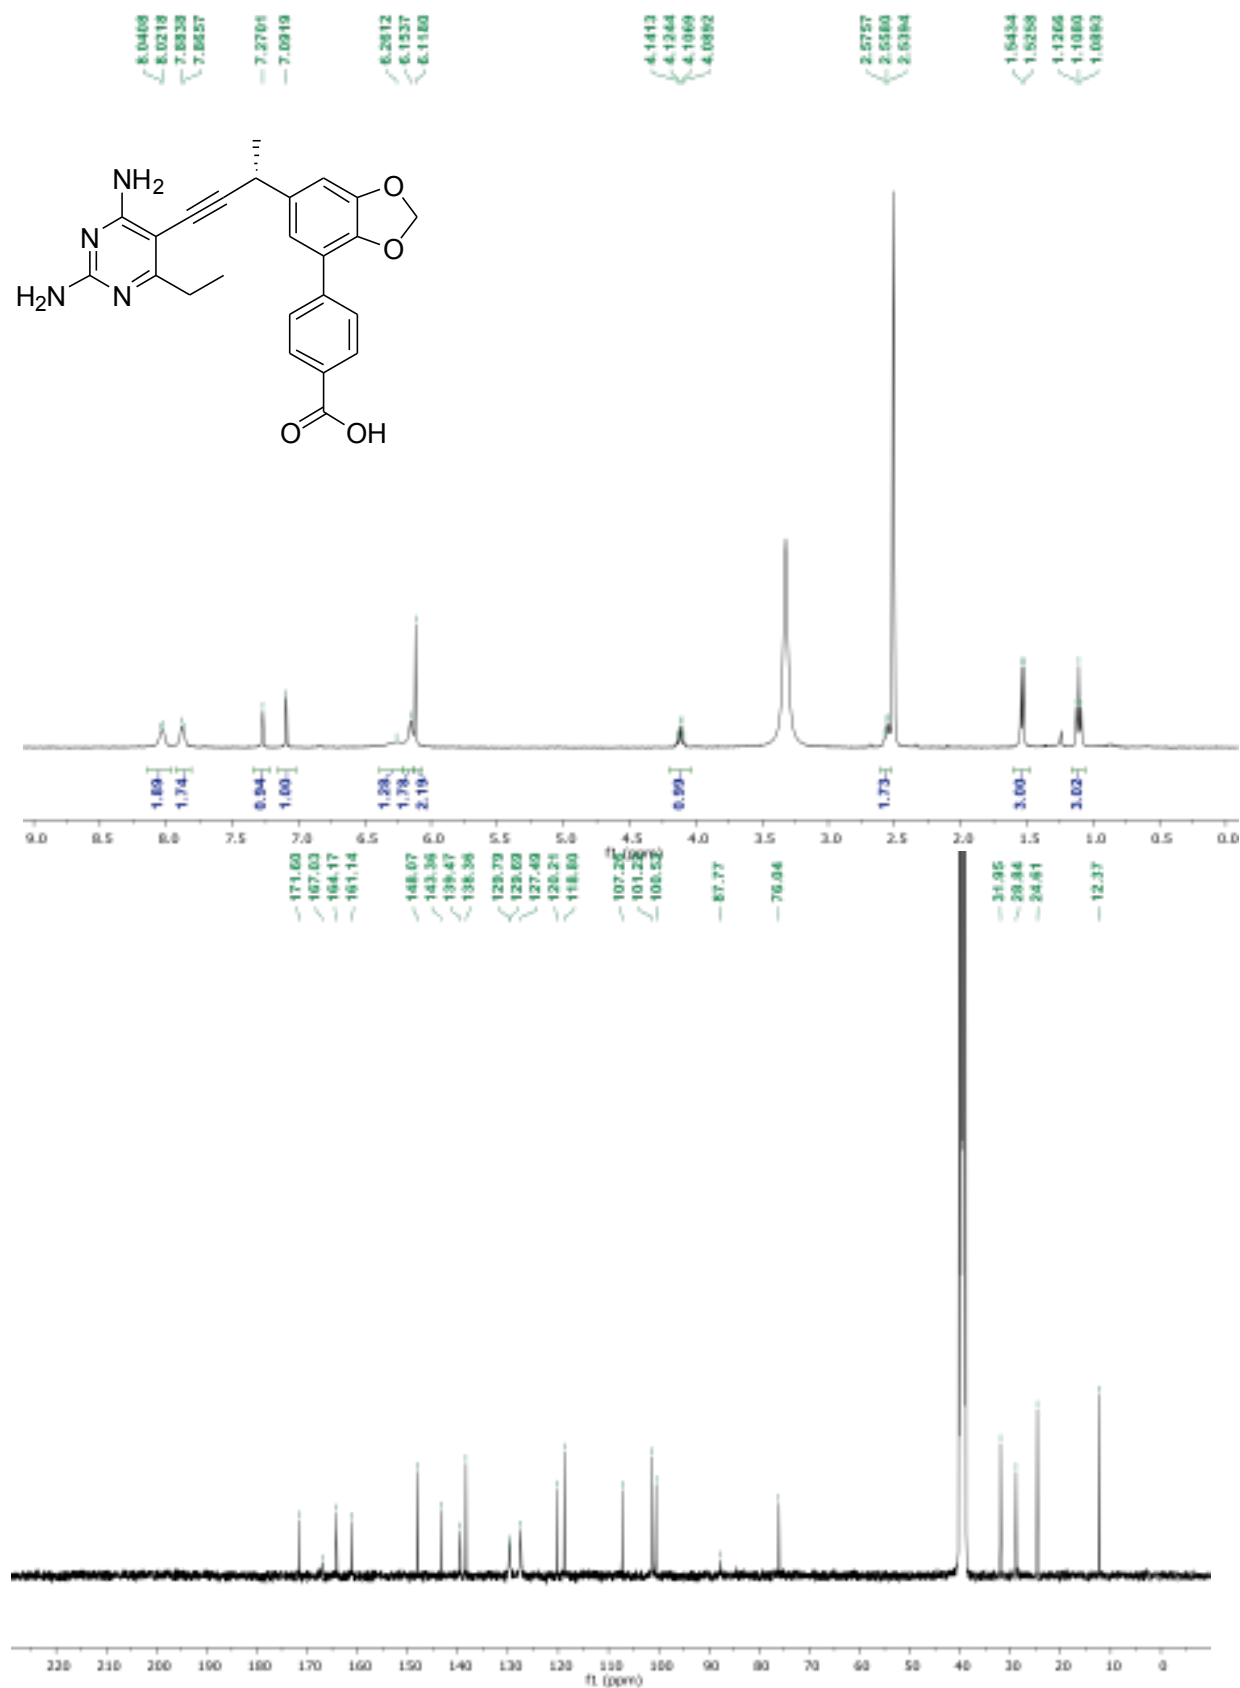

Supplement: NIHMS833252-supplement-Suppl_1.pdf [file NIHMS833252-supplement-Suppl_1.pdf]
